# Supplementary material for: A novel approach for the metric analysis of fern fronds: Growth and architecture of the Mesozoic fern Weichselia reticulata in the light of modern ferns
Source: PLoS One. 2019 Jun 27;14(6):e0219192. doi: 10.1371/journal.pone.0219192 (PMC6597107; doi:10.1371/journal.pone.0219192)
Supplement: S5 Table — Location is coded as shown in Fig 2, subzones within zone a are not included, T = total pinna. Zones b and m are grouped as DBP is very similar for these zones. (XLSX) [file pone.0219192.s007.xlsx]

## Sheet: Hoja1
Specimen	Location	Interval ratio	Error
MCCM-LH 18059-19	b-m	1023	0.025
	a	0.967	0.028
MCCM-LH 16633-L	m	1003	0.023
	a	0.98	0.034
MCCM-LH 16633-R	m	1004	0.017
	a	0.99	0.033
MCCM-LH 2958-1	T	0.999	0.072
MCCM-LH 2958-10	T	0.977	0.055
MCCM-LH 2958-12	T	0.993	0.029
MCCM-LH 2958-13	T	1008	0.035
MCCM-LH 2958-51	b-m	1004	0.029
MCCM-LH 2958-73	b-m	1002	0.034
MCCM-LH 2958-86	a	0.998	0.059
MCCM-LH 2958-89	a	0.991	0.065
MCCM-LH 2958-114	b-m	1007	0.029
MCCM-LH 2958-122	b-m	1009	0.044
MCCM-LH 2958-125	T	1006	0.038
MCCM-LH 2958-127	T	0.935	0.074
MCCM-LH 13262	b-m	1008	0.035
MCCM-LH 13514	b-m	1009	0.022
MCCM-LH 29913A-R	b-m	1007	0.025
MCCM-LH 30067	b-m	1003	0.038
MCCM-LH 2442B-1L	a	0.97a	0.016
MCCM-LH 2442B-1R	a	0.984	0.027
MCCM-LH 2442B-2R	a	0.986	0.028
MCCM-LH 2442B-3L	a	0.965	0.02
MCCM-LH 2442B-3R	a	0.99	0.025
MCCM-LH 2442B-4L	a	0.979	0.023
MCCM-LH 2442B-4R	a	0.973	0.03
MCCM-LH 2568-L	a	0.998	0.056
MCCM-LH 2568-R	a	1001	0.075
MCCM-LH 18423-L	a	0.98	0.022
MCCM-LH 18423-R	a	1003	0.04
MCCM-LH 30215B-L	a	0.973	0.019
MCCM-LH 30215B-R	a	0.98	0.024
